# Supplementary material for: BODIPY derivatives as light-induced free radical generators for hypoxic cancer treatment
Source: Royal Society of Chemistry journal article supplement (doi:10.1039/c9tb00694j), 2019-01-01
Supplement: c9tb00694j1.pdf [file c9tb00694j1.pdf]

Supporting information

# **Bodipy Derivatives as Light-induced Free Radical Generator for Hypoxic Cancer Treatment**

Nan Song,<sup>a</sup> Yuanyuan Li,<sup>c</sup> Li Chen,<sup>\*a</sup> Xiuli Hu,<sup>b</sup> Zhigang Xie<sup>\*b</sup>

<sup>a</sup>Department of Chemistry, Northeast Normal University, 5268 Renmin Street, Changchun 130024, P. R. China. \*E-mail: chenl686@nenu.edu.cn

<sup>b</sup>State Key Laboratory of Polymer Physics and Chemistry, Changchun Institute of Applied Chemistry, Chinese Academy of Sciences, 5625 Renmin Street, Changchun 130022, P. R. China. \*E-mail: xiez@ciac.ac.cn; Tel: +86-431-85262775

<sup>c</sup>The First Hospital of Jilin University, Xinmin Street, Changchun, Jilin 130021, P.R. China.

## Table of Contents

**Figure S1.** Synthesis procedure of NBDP

**Figure S2.**  $^1\text{H}$  NMR spectra of BODIPY-1 in DMSO

**Figure S3.**  $^1\text{H}$  NMR spectra of CBDP in DMSO

**Figure S4.**  $^1\text{H}$  NMR spectra of NBDP in  $\text{CDCl}_3$

**Figure S5.** The MALDI-TOF of NBDP

**Figure S6.** (a) TEM images of CBDP NPs; the stability of CBDP NPs in water b) and FBS c) over time

**Figure S7.** Photothermal heating curves of NBDP NPs with different concentrations upon  $0.75 \text{ W cm}^{-2}$  808 nm laser irradiation

**Figure S8.** Photothermal effect of the NBDP NPs dispersions under irradiation of a 808 nm laser ( $0.75 \text{ W cm}^{-2}$ ), which was turned off after irradiation for 360 seconds;

**Figure S9.** Generation of  $\text{ABTS}^+ \cdot$  as induced by the free radicals released from NBDP NPs at  $45^\circ\text{C}$  ( $\text{pH}=7$ )

**Figure 10.** The change of DPBF UV-*Vis* absorption spectra in DMF ( $\text{pH}=7$ ) when NBDP ( $10 \mu\text{M}$ ) added.

**Figure S11.** Confocal microscopic images of HeLa cells

**Figure S12.** CLSM images of HeLa cells co-stained with CBDP NPs and NBDP NPs and Lyso-Tracker Green

**Figure S13.** Cell viability of HeLa cells

**Figure S14.** CLSM images of live/dead assay (Calcein-AM/PI) on co-stained HeLa cells

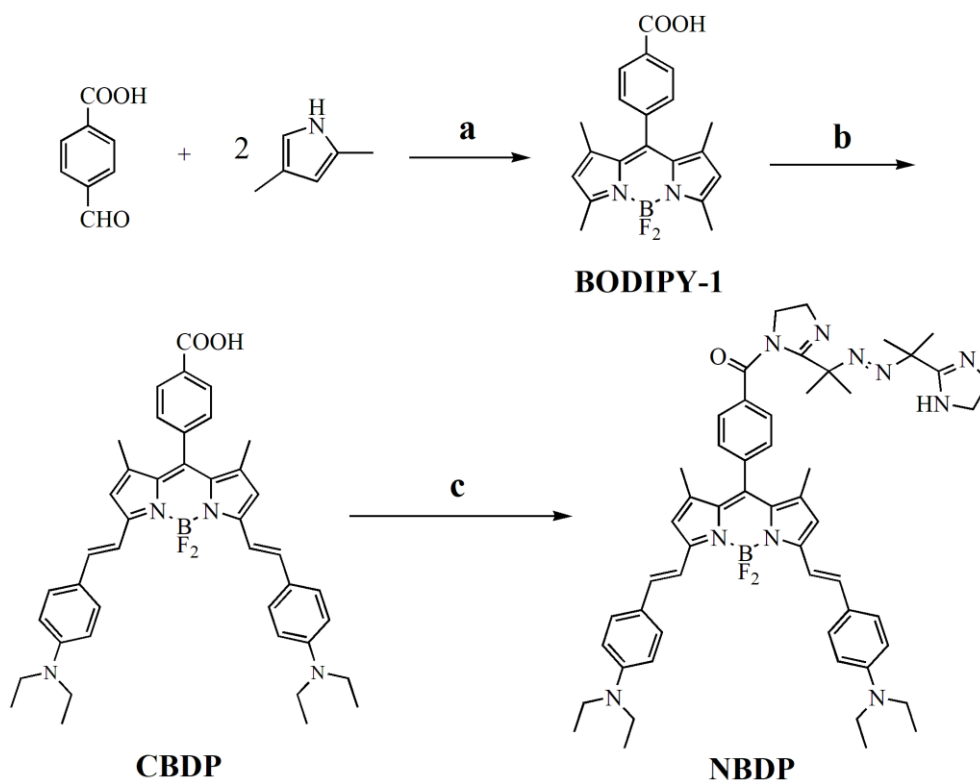

Figure S1. Synthesis procedure of NBDP. Reagents and conditions: (a) 2,4- dimethylpyrrole, TFA, 8 h; DDQ, 4 h;  $\text{Et}_3\text{N}$ ,  $\text{BF}_3\text{OEt}_2$ , 8 h; (b) p-Diethylaminobenzaldehyde, glacial acetic acid, piperidine, toluene, 8 h; (c) oxalyl chloride; AIBI.

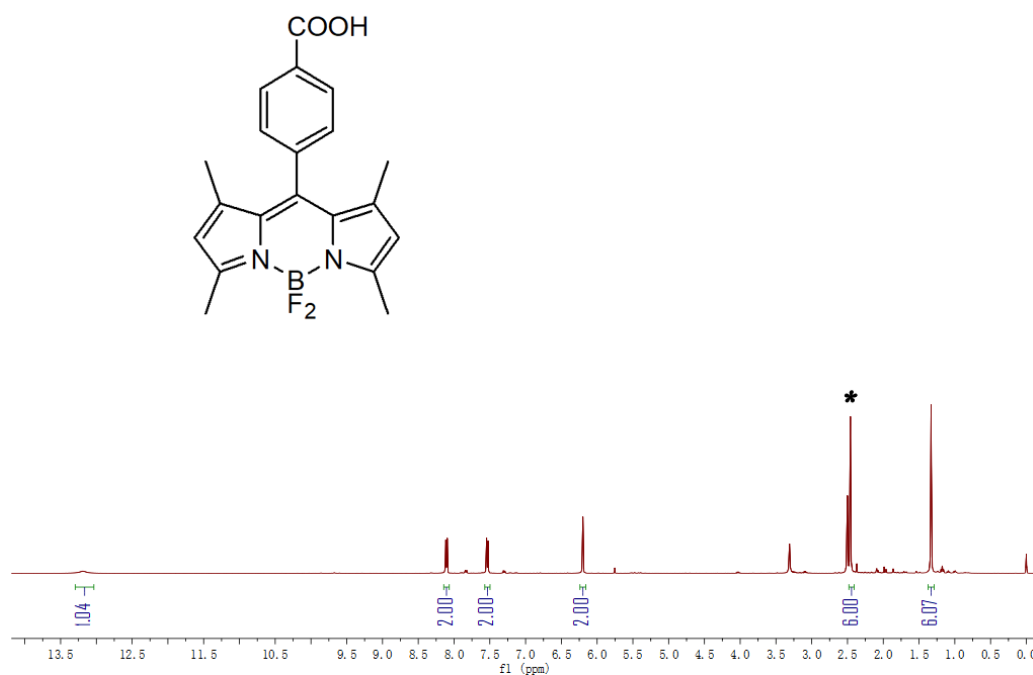

Figure S2. <sup>1</sup>H NMR spectra of BODIPY-1 in DMSO. “\*” indicate the signal of the solvent.

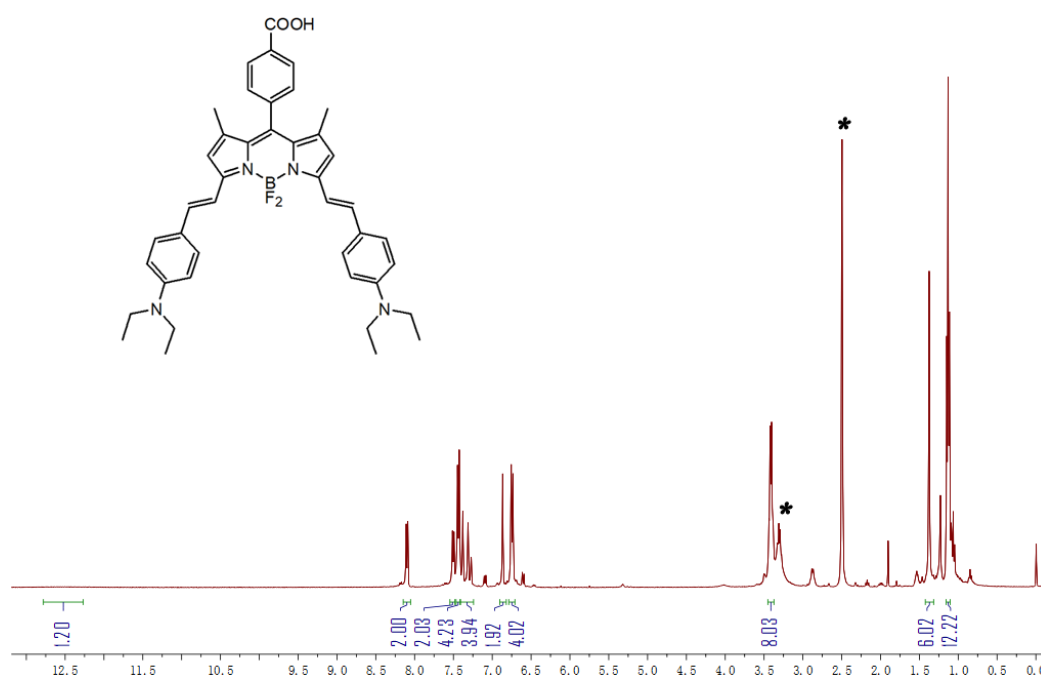

Figure S3. <sup>1</sup>H NMR spectra of CBDP in DMSO. “\*” indicate the signal of the solvent.

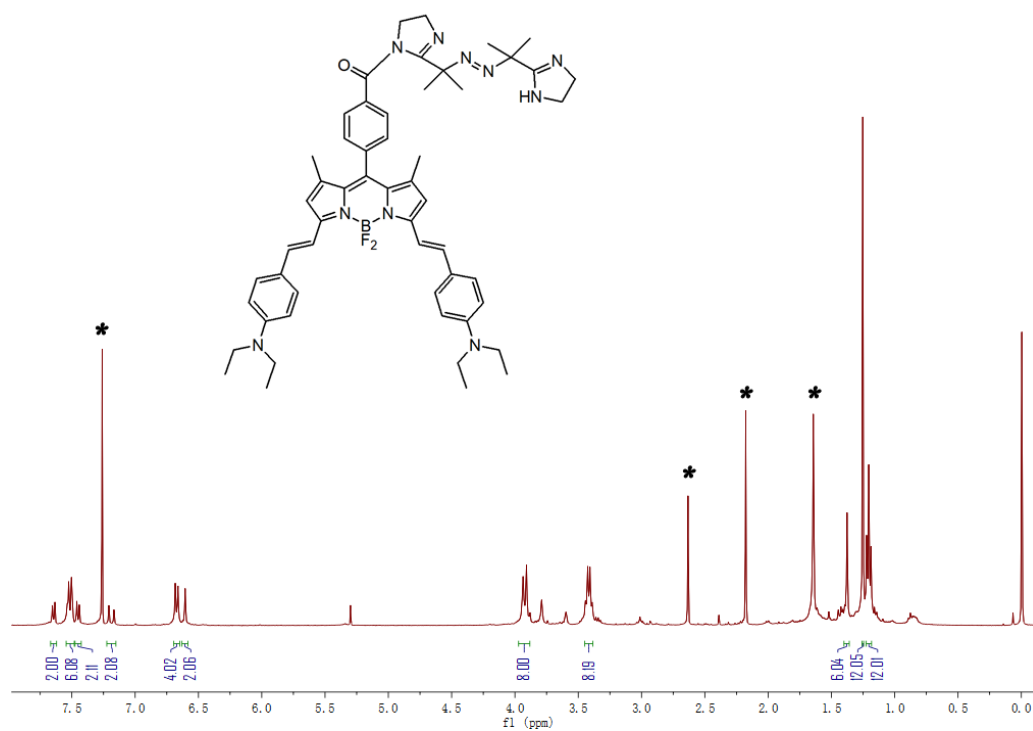

Figure S4.  $^1\text{H}$  NMR spectra of NBDP in  $\text{CDCl}_3$ . “\*” indicate the signal of the solvent.

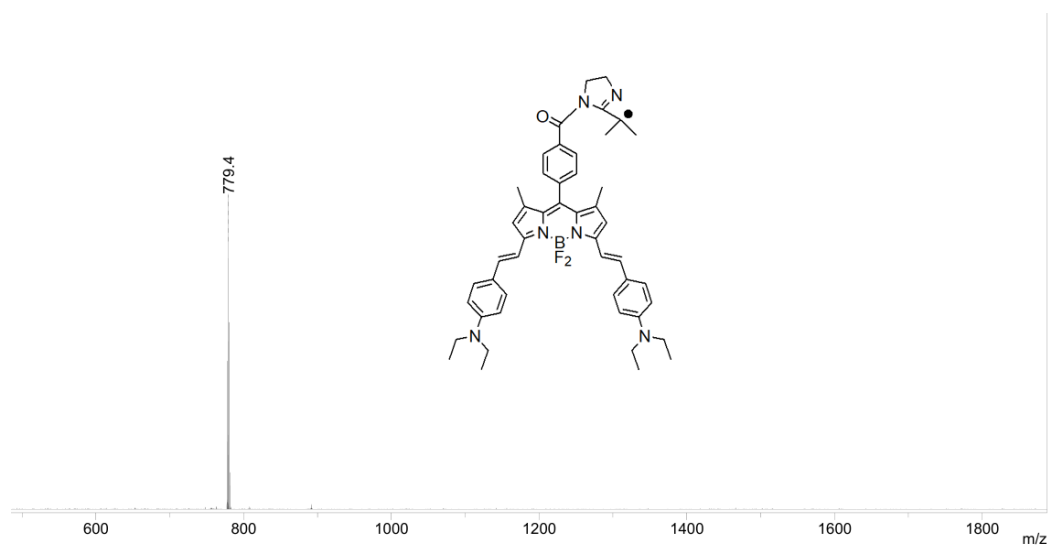

Figure S5. The MALDI-TOF of NBDP.

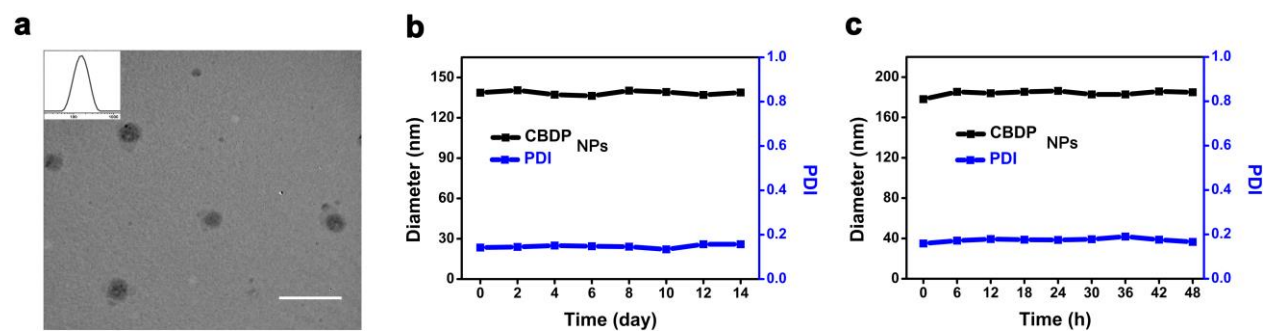

Figure S6. (a) TEM images of CBDP NPs; the stability of CBDP NPs in water b) and FBS c) over time; The inset in a): size and size distribution. Scale bar: 500 nm.



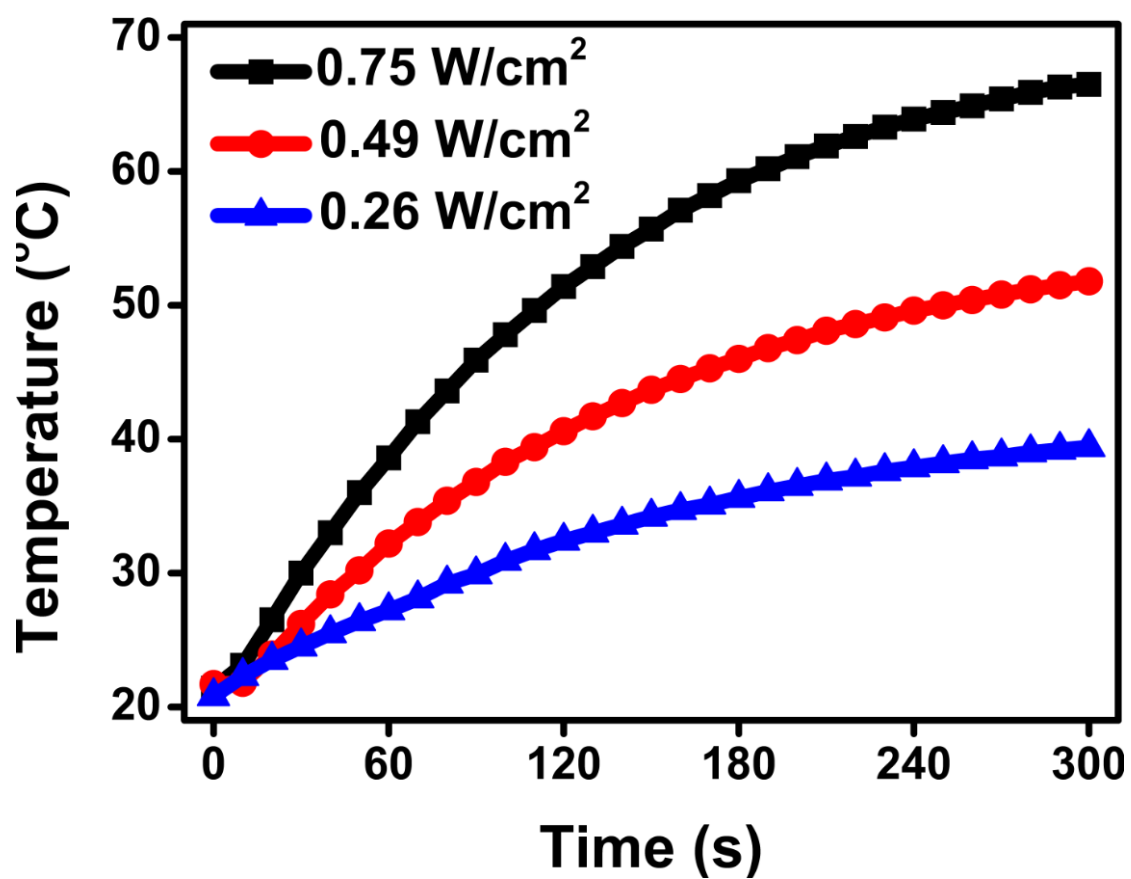

Figure S7. Photothermal heating curves of NBDP NPs with different concentrations upon  $0.75 \text{ W cm}^{-2}$  808 nm laser irradiation.

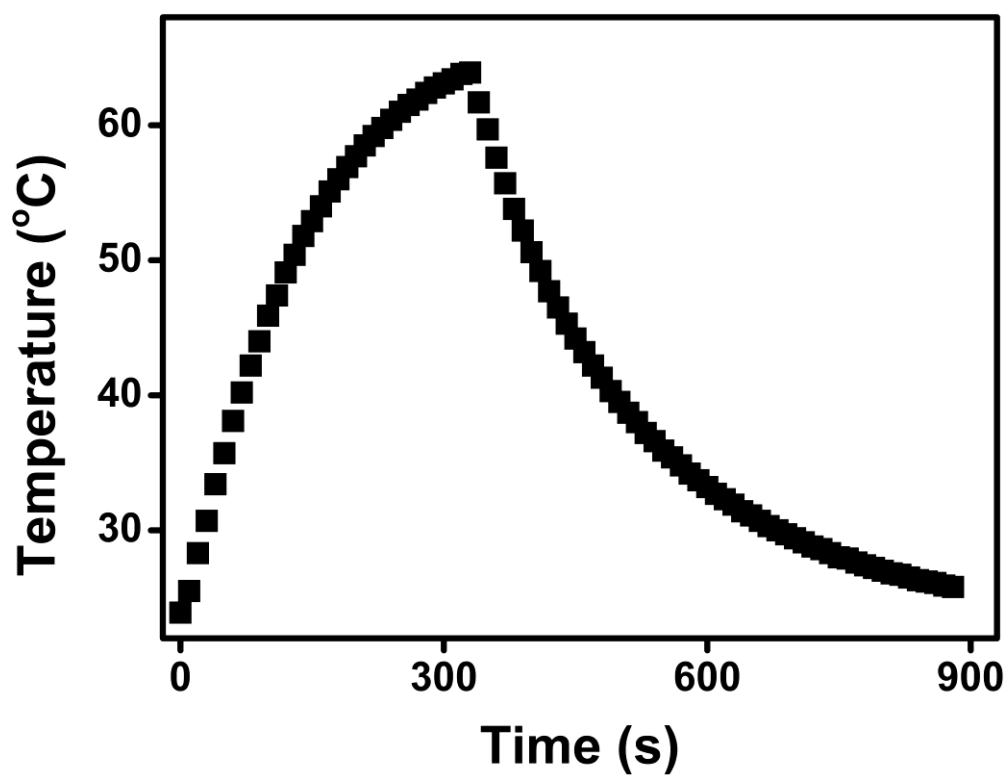

Figure S8. Photothermal effect of the NBDP NPs dispersions under irradiation of a 808 nm laser ( $0.75 \text{ W cm}^{-2}$ ), which was turned off after irradiation for 360 seconds;

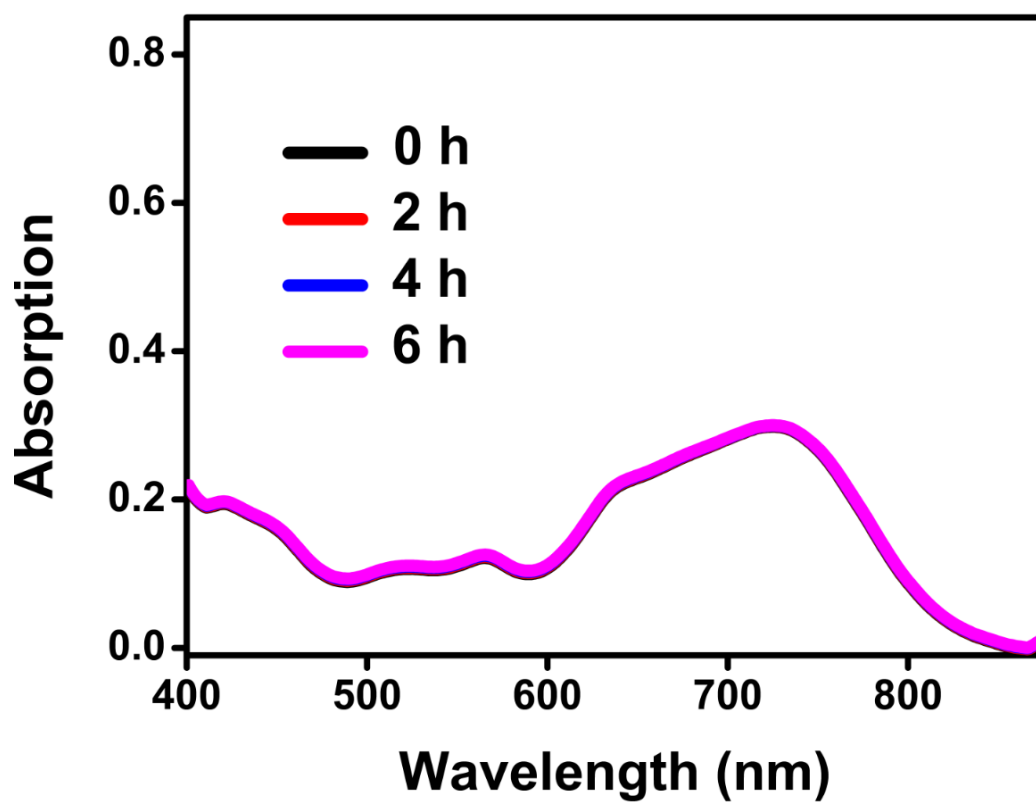

Figure S9. Generation of ABTS<sup>+</sup>• as induced by the free radicals released from NBDP NPs at 45°C (pH=7).

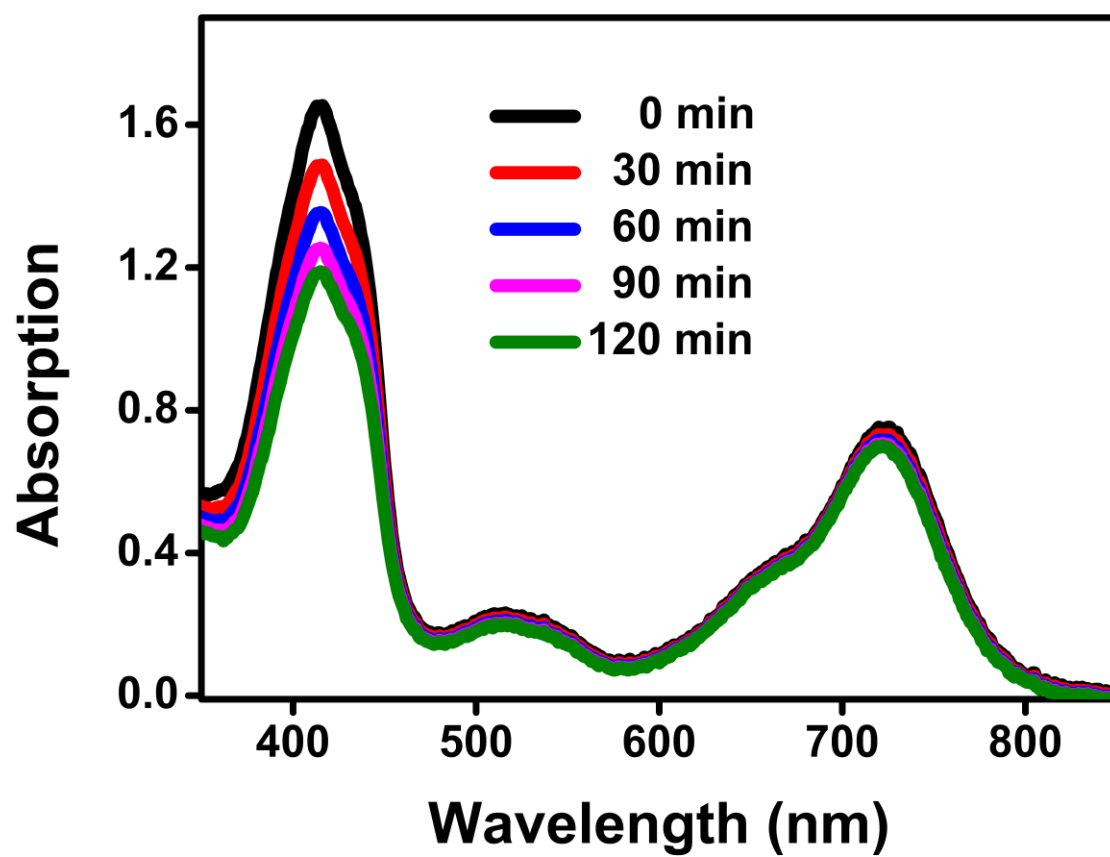

Figure 10. The change of DPBF UV-*Vis* absorption spectra in DMF (pH=7) when NBDP (10 μM) added.

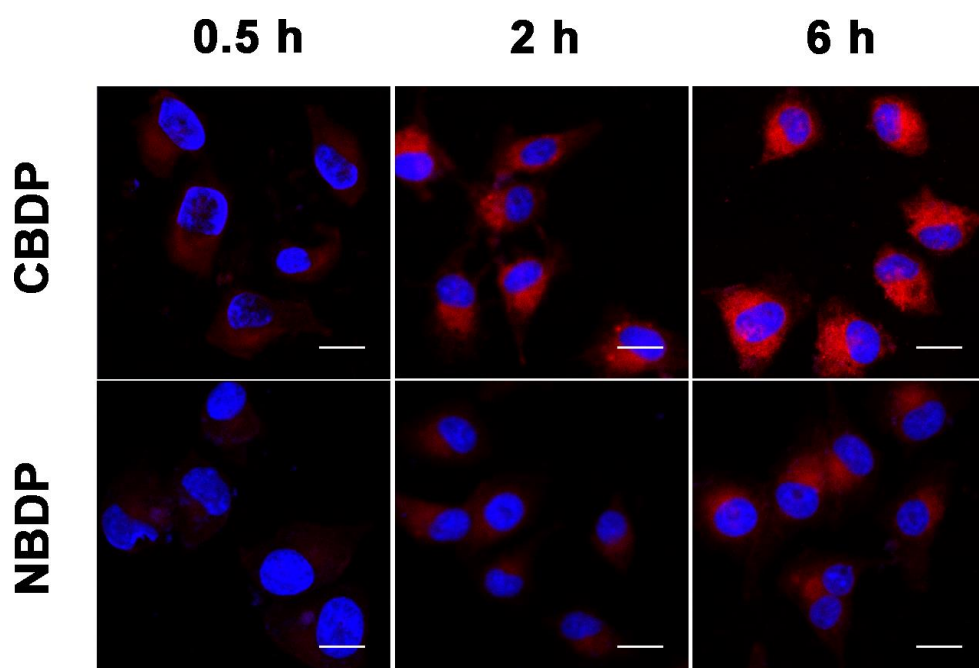

Figure S11. Confocal microscopic images of HeLa cells; after incubation with CBDP NPs and NBDP NPs (2  $\mu$ M) for 0.5 h, 2 h, 6 h at the temperature 37  $^{\circ}$ C. Scale bar: 20  $\mu$ m.

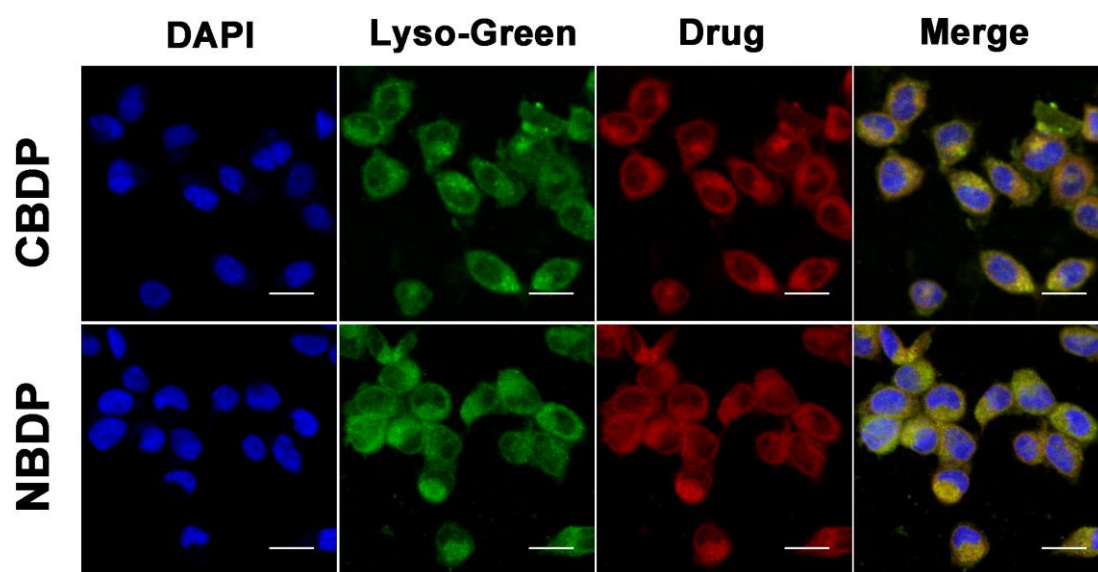

Figure S12. CLSM images of HeLa cells co-stained with CDBP NPs and NBDP NPs (2  $\mu$ M) and Lyso-Tracker Green. The images showed the fluorescence of nuclei (blue), CDBP NPs and NBDP NPs (red), Lyso-Tracker Green (green) and merged images (yellow) from left to right. Scale bar: 20  $\mu$ m.

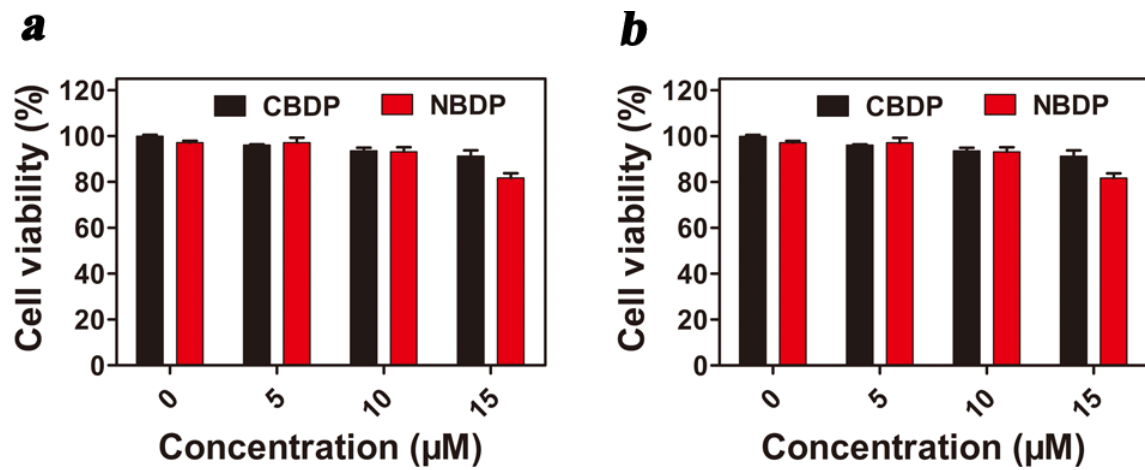

Figure S13. Cell viability of HeLa cells incubated with CBDP NPs and NBDP NPs in the dark.

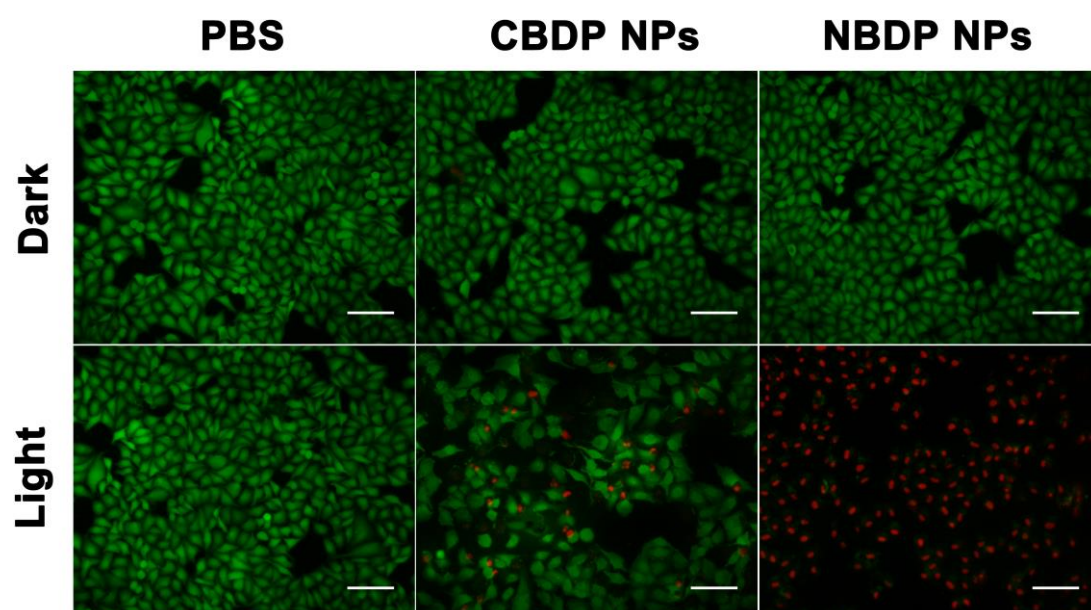

Figure S14. CLSM images of live/dead assay (Calcein-AM/PI) on co-stained HeLa cells after incubation with CBDP NPs and NBDP NPs ( 10  $\mu$ M, 0.75 W cm<sup>-2</sup>). Scale bar: 100  $\mu$ m.
